# Supplementary material
Source: ML conference proceedings conference paper supplement (https://proceedings.mlr.press/v89/zhu19a.html)
Supplement: Supplementary file 1 [file zhu19a-supp.pdf]

# Supplement: A Robust Zero-Sum Game Framework for Pool-based Active Learning

## A Proof of Theorem 1

The first part of the Theorem follows Theorem 1 in [8], and the second part follows Corollary 3.2 in [8].

## B Proof of Theorem 3 and Step Size Setting

*Proof.* Following Lemma 1 of [26], for any  $\mathbf{p} \in \Delta_n$  and  $\mathbf{w} \in \Omega$  we have

$$\begin{aligned} \frac{1}{T} \mathbb{E} \left[ \sum_{t=1}^T \mathbf{p}^\top \bar{\ell}(\mathbf{w}_t) - \mathbf{p}_t^\top \bar{\ell}(\mathbf{w}) \right] &\leq \frac{\|\mathbf{w} - \mathbf{w}_1\|_2^2}{T\eta} + \frac{\eta}{2} G^2 \\ &\quad + \frac{1}{T} \mathbb{E} \left[ \sum_{t=1}^T \bar{\ell}(\mathbf{w}_t)^\top (\mathbf{p} - \mathbf{p}_t) \right] \end{aligned}$$

Next, we bound the last term in the above inequality.

$$\mathbb{E} \left[ \sum_{t=1}^T \bar{\ell}(\mathbf{w}_t)^\top (\mathbf{p} - \mathbf{p}_t) \right] = \mathbb{E} \left[ \sum_{t=1}^T \hat{\mathbf{v}}_t^\top (\mathbf{p} - \mathbf{p}_t) \right] + \mathbb{E} \left[ \sum_{t=1}^T (\bar{\ell}(\mathbf{w}_t) - \hat{\mathbf{v}}_t)^\top (\mathbf{p} - \mathbf{p}_t) \right]$$

Following the analysis of mirror descent on  $\mathbf{p}_t$  (e.g., Lemma 2 in [26]), we have

$$\mathbb{E} \left[ \sum_{t=1}^T \hat{\mathbf{v}}_t^\top (\mathbf{p} - \mathbf{p}_t) \right] \leq \frac{D(\mathbf{p}, \mathbf{p}_1)}{\alpha} + \alpha \sum_{t=1}^T \|\bar{\mathbf{v}}_t\|_\infty^2 \leq \frac{D(\mathbf{p}, \mathbf{p}_1)}{\alpha} + T\alpha M^2$$

In addition,

$$\begin{aligned} \mathbb{E} \left[ \sum_{t=1}^T (\bar{\ell}(\mathbf{w}_t) - \hat{\mathbf{v}}_t)^\top (\mathbf{p} - \mathbf{p}_t) \right] &\leq \mathbb{E} \left[ \sum_{t=1}^T MR \|\mathbf{w}_t - \mathbf{w}_*\|_2 \right] \\ &\leq \mathbb{E} \left[ \sum_{t=1}^T MR (\|\mathbf{w}_t - \hat{\mathbf{w}}\|_2 + \|\hat{\mathbf{w}} - \mathbf{w}_*\|_2) \right] \end{aligned}$$

$$\begin{aligned} &\leq TMR \cdot O(1/n^\beta) + \mathbb{E} \left[ \sum_{t=1}^T MR \hat{c}(\mathcal{L}(\mathbf{w}_t) - \mathcal{L}(\widehat{\mathbf{w}})) \right] \\ &\leq TMR \cdot O(1/n^\beta) + TMR \hat{c} \mathbb{E}[(\mathcal{L}(\mathbf{w}_\tau) - \mathcal{L}(\widehat{\mathbf{w}}))] \end{aligned}$$

where the first inequality uses that  $1/\exp(-Y\mathbf{w}^\top\mathbf{x})$  is  $R/4$ -Lipchitz continuous function,  $\bar{\ell}(\mathbf{w}_i; \mathbf{x}_i) \in [0, M]$  and  $\|\mathbf{p} - \mathbf{p}_i\|_1 \leq 2$ . Combining the above inequalities together, we have

$$\begin{aligned} \mathbb{E}[\mathbf{p}^\top \bar{\ell}(\mathbf{w}_\tau)] - \max_{\mathbf{p} \in \Delta_n} \mathbf{p}^\top \bar{\ell}(\widehat{\mathbf{w}}) &\leq \frac{4r^2}{T\eta} + \frac{\eta}{2} G^2 + \frac{D(\mathbf{p}, \mathbf{p}_1)}{\alpha T} \\ &+ \alpha M^2 + MR \cdot O(1/n^\beta) + MR \hat{c} \mathbb{E}[(\mathcal{L}(\mathbf{w}_\tau) - \mathcal{L}(\widehat{\mathbf{w}}))] \end{aligned}$$

Let  $\mathbf{p}$  be the vector that maximizes  $\mathbf{p}^\top \bar{\ell}(\mathbf{w}_\tau)$ , and suppose  $D(\mathbf{p}, \mathbf{p}_1) \leq \mathcal{D}$ ,  $\eta = 2\sqrt{2}r/(G\sqrt{T})$  and  $\alpha = \sqrt{\mathcal{D}/(M^2T)}$ , then

$$\mathbb{E}[(\mathcal{L}(\mathbf{w}_\tau) - \mathcal{L}(\widehat{\mathbf{w}}))] \leq \frac{4\sqrt{2}rG}{\sqrt{T}} + 4\sqrt{\mathcal{D}} \frac{M}{\sqrt{T}} + MR \cdot O\left(\frac{1}{n^\beta}\right)$$

For constrained problems, we have  $\mathcal{D} = \rho/n$ . For regularized problems, we can use the bound  $D(\mathbf{p}, \mathbf{p}_1) \leq \log(n)$  for KL divergence and  $D(\mathbf{p}, \mathbf{p}_1) \leq 2$  for Euclidean divergence.  $\square$

## C Dataset Statistics

Table 1: Statistics of Datasets

| Dataset            | # Feature   | # Training | # Testing |
|--------------------|-------------|------------|-----------|
| svmguide3          | 22          | 1243       | 41        |
| breast-cancer      | 9           | 200        | 77        |
| twonorm            | 20          | 400        | 7000      |
| ringnorm           | 20          | 400        | 7000      |
| flare solar        | 9           | 666        | 400       |
| heart              | 13          | 170        | 100       |
| german             | 20          | 700        | 300       |
| diabetis           | 8           | 468        | 300       |
| duke breast-cancer | 7129        | 38         | 4         |
| madelon            | 500         | 2000       | 600       |
| MNIST              | 28 * 28     | 55000      | 10000     |
| CIFAR-10           | 32 * 32 * 3 | 50000      | 10000     |
